# Supplementary material
Source: PubMed Central journal article supplement (PMC6708465)
Supplement: NIHMS1533790-supplement-1.pdf [file NIHMS1533790-supplement-1.pdf]

A

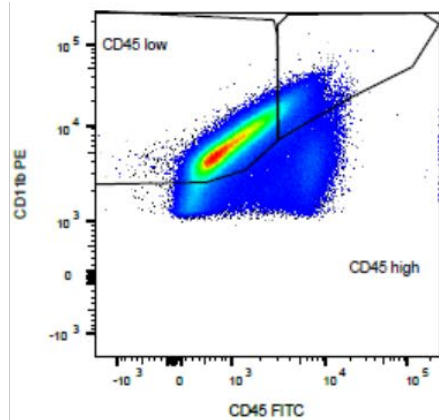

PID3\_SHAMREG\_003.fcs

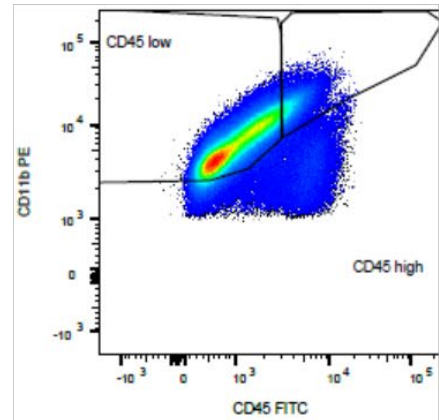

PID3\_SHAMDHA\_002.fcs

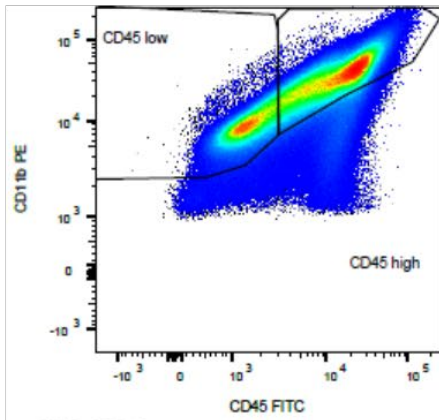

PID3\_CC11.fcs

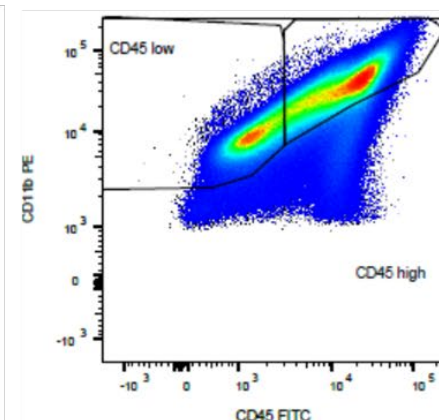

PID3\_DHACCI1.fcs

B

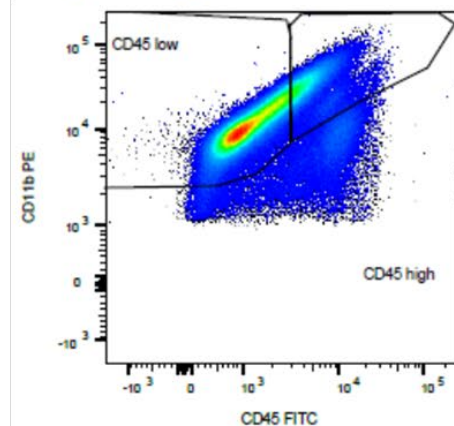

PID7\_SHAMREG\_002.fcs

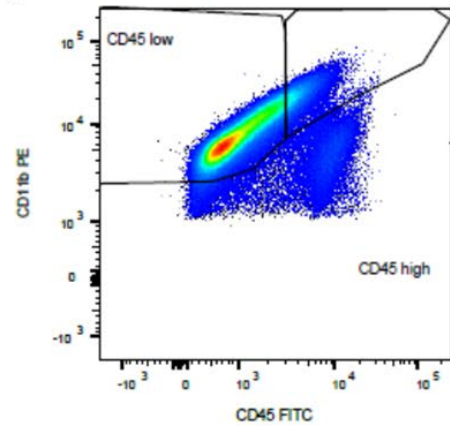

PID7\_SHAMDHA\_003.fcs

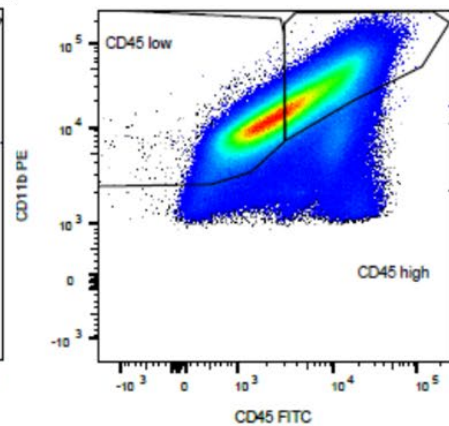

PID7\_CCIREG\_002.fcs

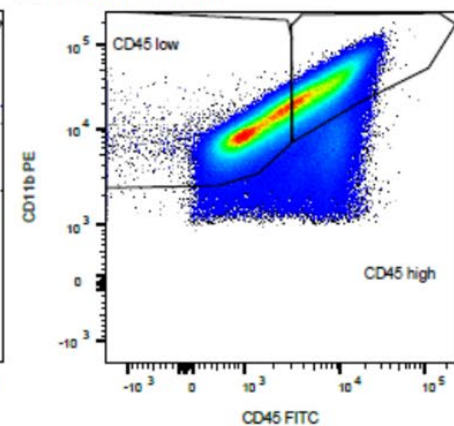

PID7\_CCIDHA\_003.fcs

C

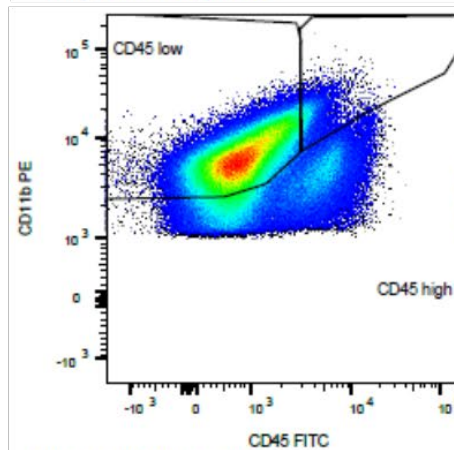

PID30\_SHAMREG\_002.fcs

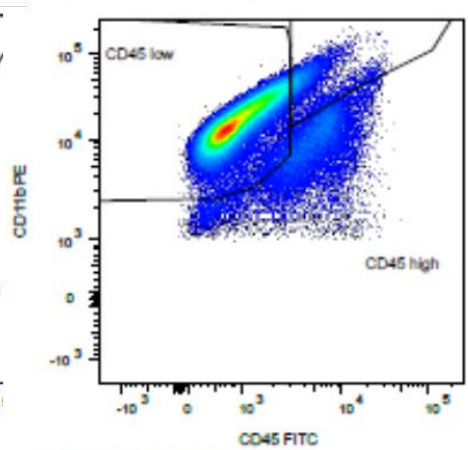

PID30\_001\_SHAMDHA\_001.fcs

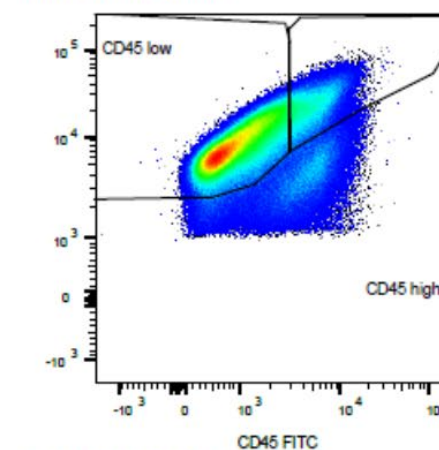

PID30\_CCIREG\_001.fcs

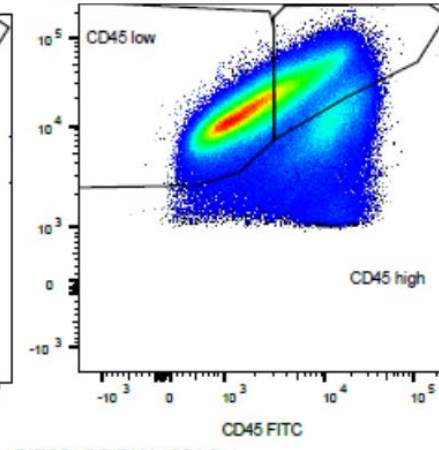

PID30\_CCIDHA\_001.fcs
