# Supplementary material
Source: PubMed Central journal article supplement (PMC6708465)

## Microglia (Iba-1) PID30

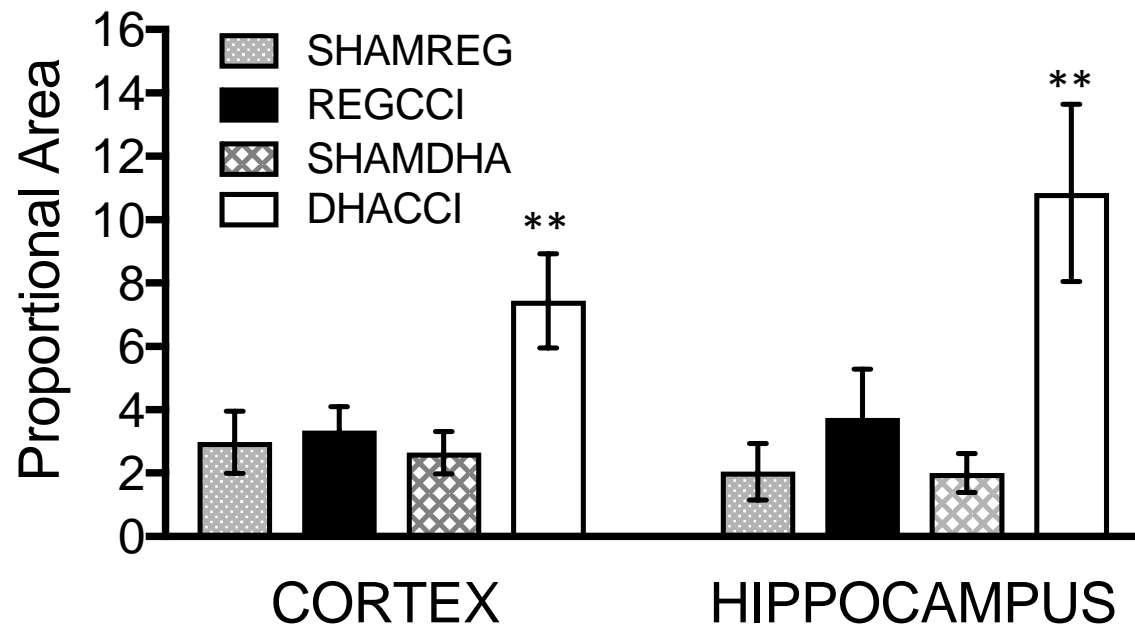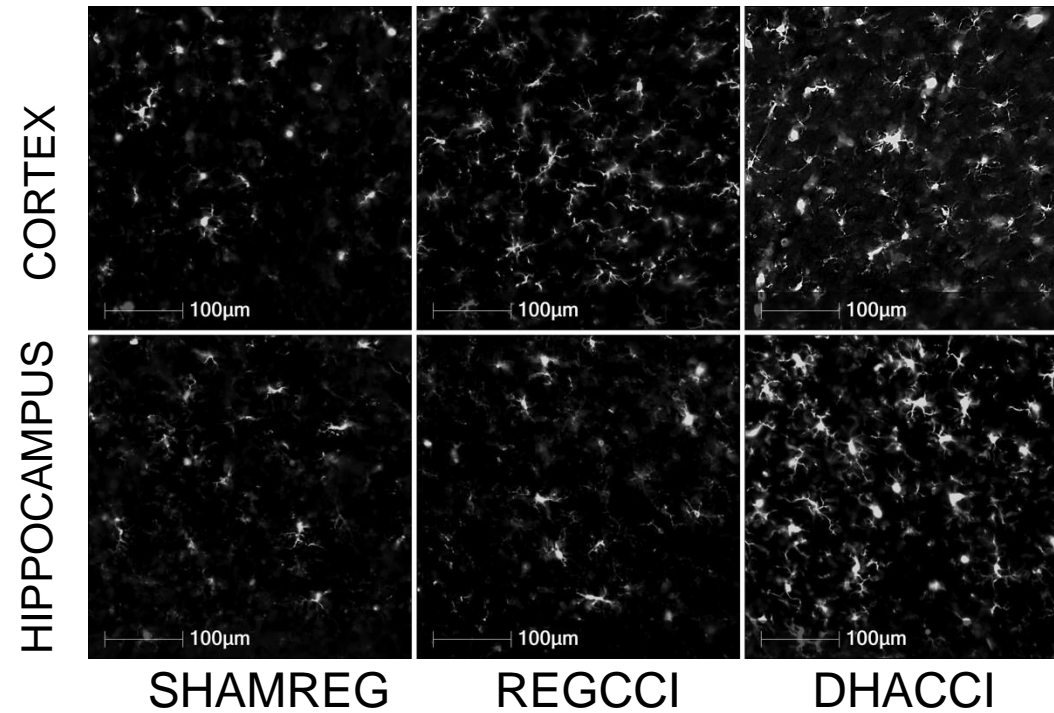

Supplement: NIHMS1533790-supplement-2.pdf [file NIHMS1533790-supplement-2.pdf]
